# Supplementary material
Source: PubMed Central journal article supplement (PMC2718264)
Supplement: mmc1.pdf [file mmc1.pdf]

Biophysical Journal, Volume 96

**Supporting Material**

**Structure of a Double Transmembrane Fragment of a G Protein-Coupled Receptor  
in Micelles**

Alexey Neumoin, Leah S. Cohen, Boris Arshava, Subramanyam Tantry, Jeffrey M.  
Becker, Oliver Zerbe, and Fred Naider

## Supplementary Material

**Figure S1:** Cleavage and purification of the selectively methyl labeled Ste2p(G31-T110) peptide. Top panel: Inclusion bodies containing the fusion protein prior to cleavage with CNBr. Inset: SDS-PAGE gel of the inclusion bodies to show protein expression levels stained with Coomassie Blue (M=Marker, FP=fusion protein). The arrow indicates the protein of interest with an expected MW of ~23 kDa. Middle panel: Chromatogram of CNBr cleavage reaction after 1 hour. Lower panel: Analytical RP-HPLC of the purified Ste2p(G31-T110) after CNBr cleavage and purification on a preparative scale. Analytical reversed phase HPLC was performed with a 36-90% acetonitrile:water gradient with 10% isopropanol, 0.1% trifluoroacetic acid at 60°C on a Zorbax 300SB-C3 column.

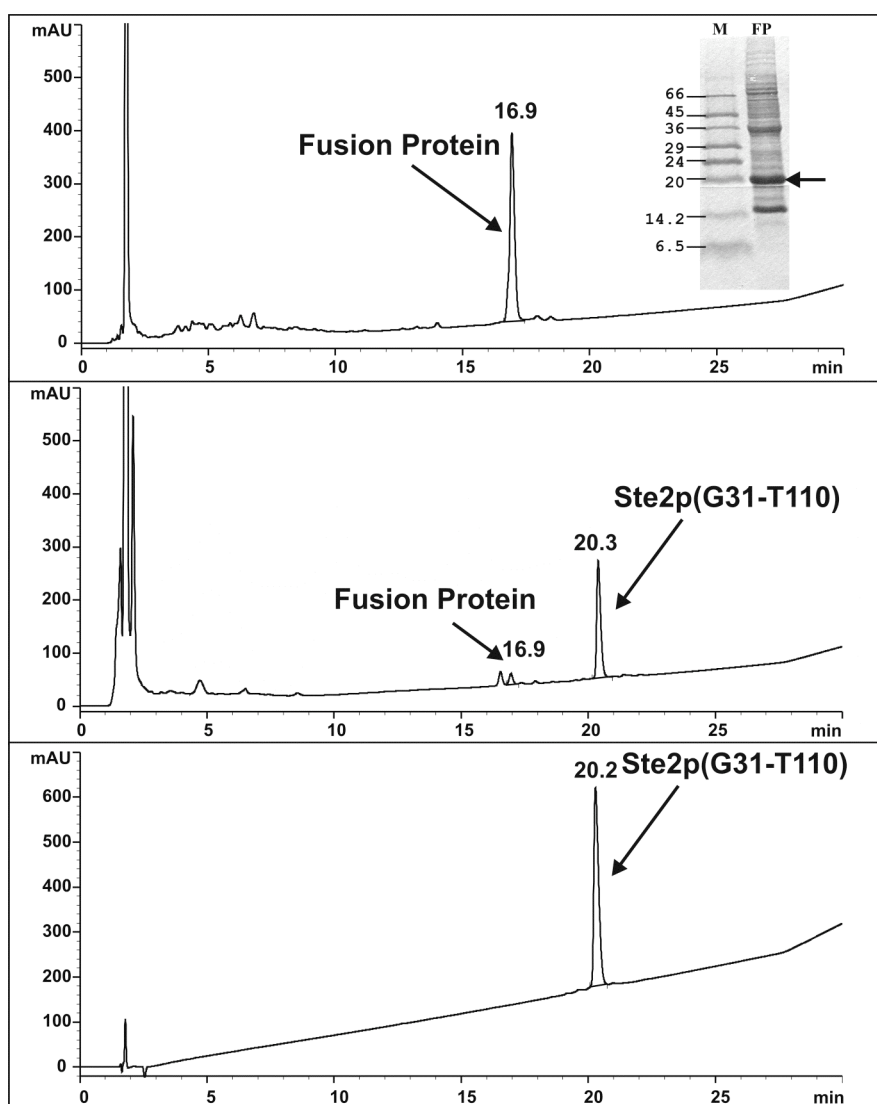

**Table S2:** Overview on spectroscopic details for the used 2D and 3D NMR experiments

| Experiment                                                                 | Data matrix size                                                                                                                                                 | Max. evolution times                                                                                                                                                                                                                                     | Number of scans |
|----------------------------------------------------------------------------|------------------------------------------------------------------------------------------------------------------------------------------------------------------|----------------------------------------------------------------------------------------------------------------------------------------------------------------------------------------------------------------------------------------------------------|-----------------|
| $[^{15}\text{N}, ^1\text{H}]\text{-HSQC}$                                  | $2048(^1\text{H}) * 512(^{15}\text{N})$                                                                                                                          | $t_{2\text{max}} 91.0\text{ms}$<br>$t_{1\text{max}} 164.0\text{ms}$                                                                                                                                                                                      | 128             |
| ct- $[^{13}\text{C}, ^1\text{H}]\text{-HSQC}$                              | $2048(^1\text{H}) * 370(^{13}\text{C})$                                                                                                                          | $t_{2\text{max}} 109.9\text{ms}$<br>$t_{1\text{max}} 13.1\text{ms}$                                                                                                                                                                                      | 64              |
| Aromatic $[^{13}\text{C}, ^1\text{H}]\text{-HSQC}$                         | $2048(^1\text{H}) * 256(^{13}\text{C})$                                                                                                                          | $t_{2\text{max}} 114.0\text{ms}$<br>$t_{1\text{max}} 19.6\text{ms}$                                                                                                                                                                                      | 32              |
| HNCO                                                                       | $2048(^1\text{H}) * 40(^{15}\text{N}) * 128(^{13}\text{C})$                                                                                                      | $t_{3\text{max}} 105\text{ms}$<br>$t_{2\text{max}} 14.1\text{ms}$<br>$t_{1\text{max}} 16.5\text{ms}$                                                                                                                                                     | 8               |
| HN(CA)CO                                                                   | $2048(^1\text{H}) * 40(^{15}\text{N}) * 128(^{13}\text{C})$                                                                                                      | $t_{3\text{max}} 105\text{ms}$<br>$t_{2\text{max}} 14.1\text{ms}$<br>$t_{1\text{max}} 16.5\text{ms}$                                                                                                                                                     | 8               |
| HNCA                                                                       | $2048(^1\text{H}) * 40(^{15}\text{N}) * 128(^{13}\text{C})$                                                                                                      | $t_{3\text{max}} 105\text{ms}$<br>$t_{2\text{max}} 14.1\text{ms}$<br>$t_{1\text{max}} 4.9\text{ms}$                                                                                                                                                      | 8               |
| HN(CO)CA                                                                   | $2048(^1\text{H}) * 40(^{15}\text{N}) * 128(^{13}\text{C})$                                                                                                      | $t_{3\text{max}} 105\text{ms}$<br>$t_{2\text{max}} 14.1\text{ms}$<br>$t_{1\text{max}} 4.9\text{ms}$                                                                                                                                                      | 8               |
| HNCACB                                                                     | $2048(^1\text{H}) * 40(^{15}\text{N}) * 128(^{13}\text{C})$                                                                                                      | $t_{3\text{max}} 105\text{ms}$<br>$t_{2\text{max}} 14.1\text{ms}$<br>$t_{1\text{max}} 4.9\text{ms}$                                                                                                                                                      | 16              |
| CBCA(CO)NH                                                                 | $2048(^1\text{H}) * 40(^{15}\text{N}) * 128(^{13}\text{C})$                                                                                                      | $t_{3\text{max}} 105\text{ms}$<br>$t_{2\text{max}} 14.1\text{ms}$<br>$t_{1\text{max}} 4.9\text{ms}$                                                                                                                                                      | 16              |
| (H)CCH-TOCSY                                                               | $2048(^1\text{H}) * 50(^{13}\text{C}) * 100(^{13}\text{C})$                                                                                                      | $t_{3\text{max}} 105\text{ms}$<br>$t_{2\text{max}} 4.7\text{ms}$<br>$t_{1\text{max}} 9.5\text{ms}$                                                                                                                                                       | 16              |
| $^{15}\text{N}\{^1\text{H}\}\text{-NOE}$                                   | $2048(^1\text{H}) * 600(^{15}\text{N})$                                                                                                                          | $t_{2\text{max}} 91.0\text{ms}$<br>$t_{1\text{max}} 248.0\text{ms}$                                                                                                                                                                                      | 128             |
| HMCMCBCANH                                                                 | For Val and Ile residues<br>$2048(^1\text{H}) * 40(^{15}\text{N}) * 36(^{13}\text{C})$<br><br>For Leu residues<br>$2048 * 40(^{15}\text{N}) * 60(^{13}\text{C})$ | For Val and Ile residues<br>$t_{3\text{max}} 105\text{ms}$<br>$t_{2\text{max}} 12.8\text{ms}$<br>$t_{1\text{max}} 6.8\text{ms}$<br>For Leu residues<br>$t_{3\text{max}} 105\text{ms}$ , $t_{2\text{max}} 12.8\text{ms}$ , $t_{1\text{max}} 9.5\text{ms}$ | 64              |
| HBCBCGCDHD                                                                 | $2048(^1\text{H}) * 58(^{13}\text{C})$                                                                                                                           | $t_{2\text{max}} 91\text{ms}$<br>$t_{1\text{max}} 4.1\text{ms}$                                                                                                                                                                                          | 128             |
| $^{15}\text{N}$ -resolved NOESY recorded on 700MHz at University of Zurich | $2048(^1\text{H}) * 50(^{15}\text{N}) * 180(^1\text{H})$                                                                                                         | $t_{3\text{max}} 105.0\text{ms}$<br>$t_{2\text{max}} 16.0\text{ms}$<br>$t_{1\text{max}} 13.0\text{ms}$<br>mixing time 100ms                                                                                                                              | 32              |
| Aliphatic $^{13}\text{C}$ -resolved NOESY                                  | $2048(^1\text{H}) * 50(^{13}\text{C}) * 100(^1\text{H})$                                                                                                         | $t_{3\text{max}} 57.0\text{ms}$<br>$t_{2\text{max}} 5.1\text{ms}$                                                                                                                                                                                        | 16              |

|                                                                                                                                       |                                                          |                                                                              |    |
|---------------------------------------------------------------------------------------------------------------------------------------|----------------------------------------------------------|------------------------------------------------------------------------------|----|
| recorded on 900MHz at<br>New York Center for<br>Structural Biology                                                                    |                                                          | $t_1$ max 10.7ms<br>mixing time 80ms                                         |    |
| Aromatic $^{13}\text{C}$ -resolved<br>NOESY<br>recorded on 900MHz at<br>New York Center for<br>Structural Biology                     | $2048(^1\text{H}) * 50(^{13}\text{C}) * 100(^1\text{H})$ | $t_3$ max 57.0ms<br>$t_2$ max 5.1ms<br>$t_1$ max 10.7ms<br>mixing time 80ms  | 16 |
| Aliphatic-optimized $^{13}\text{C}$ -<br>resolved NOESY on a<br>selectively Me-labeled<br>sample recorded on<br>900MHz at ETH, Zurich | $2048(^1\text{H}) * 50(^{13}\text{C}) * 100(^1\text{H})$ | $t_3$ max 81.2ms<br>$t_2$ max 5.9ms<br>$t_1$ max 20.0ms<br>mixing time 250ms | 16 |

**Figure S3.** Strips from the 3D HNCA (left) and the  $^{15}\text{N}$ -resolved NOESY (right) spectra of uniformly  $^{15}\text{N}$ ,  $^{13}\text{C}$ -labeled Ste2p(G31-T110) extracted at various amide proton positions displaying the assignment and validation processes of the  $^{15}\text{N}$ ,  $^{13}\text{C}$  and  $^1\text{H}$  chemical shifts. The  $^{15}\text{N}$  and  $^1\text{H}$  chemical shifts, at which the strips were extracted, are displayed above and below the strips, respectively.

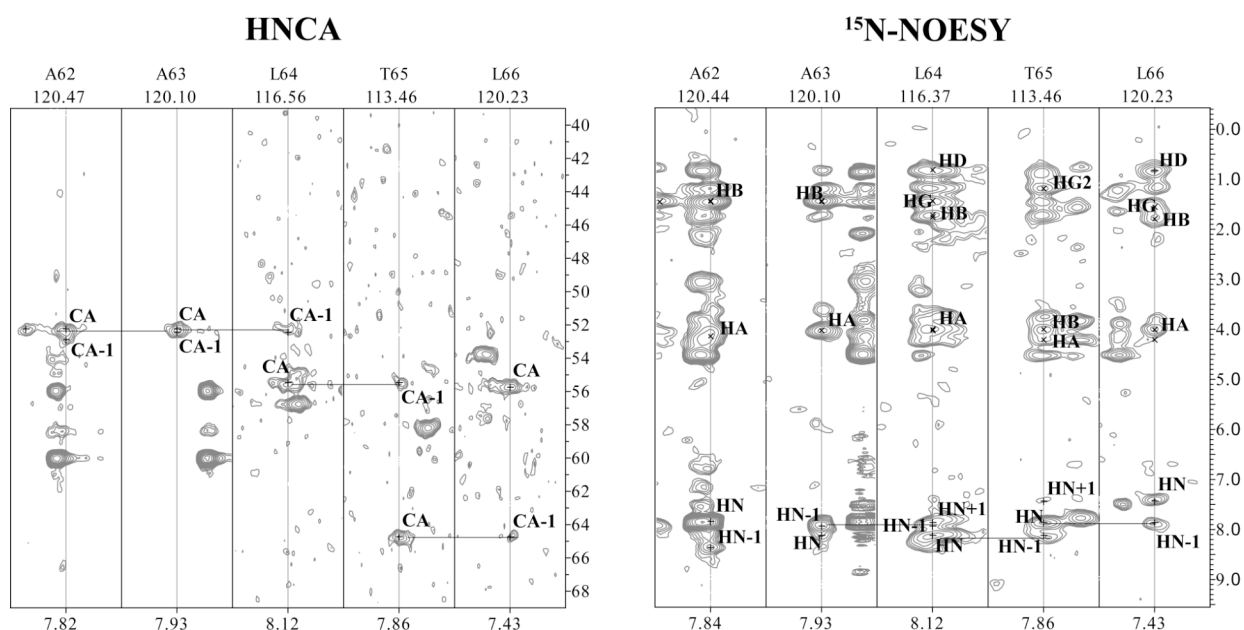

**Figure S4.** Methyl region from the ct- $^{13}\text{C},^1\text{H}$ -HSQC of various Ste2p(G31-T110) samples: Left –  $^{15}\text{N},^{13}\text{C}$ -labeled Ste2p(G31-T110) in the LPPG solution, recorded on a 700MHz magnet; Middle –  $^{15}\text{N},^{13}\text{C}$ -labeled Ste2p(G31-T110) in the  $\text{d}_3$ -LPPG solution, recorded on a 900MHz magnet; Right -  $^{15}\text{N},^{13}\text{C},^2\text{H},^1\text{H}$ (Methyl – Ile,Leu,Val)]-labeled Ste2p(G31-T110) in  $\text{d}_3$ -LPPG solution, recorded at 900MHz. The regions containing methyl groups of Ile or Leu residues are marked with boxes.

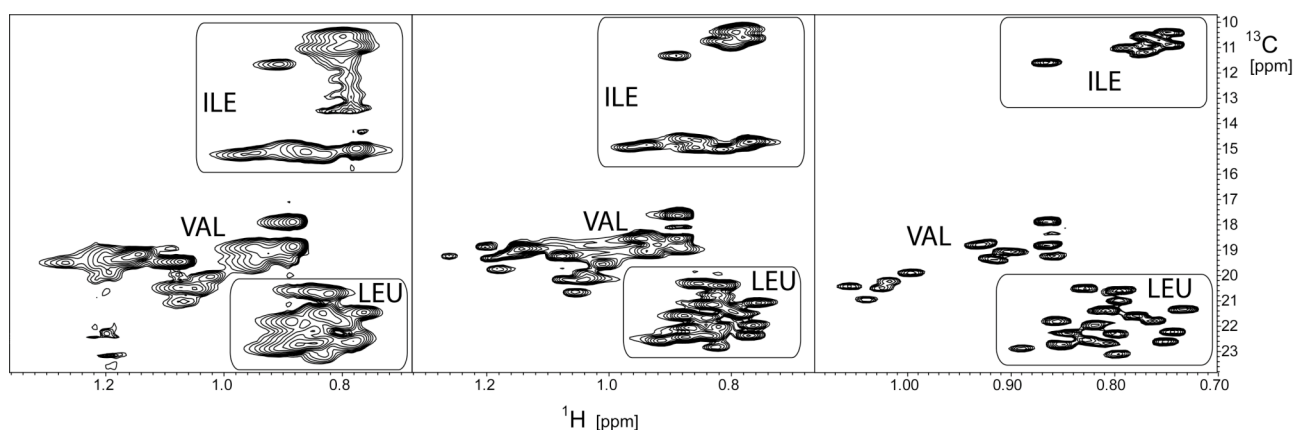

**Figure S5:** Values of the  $^{15}\text{N}\{^1\text{H}\}$ -NOE of Ste2p(G31-T110). The  $^{15}\text{N}\{^1\text{H}\}$ -NOEs were determined using spectra recorded at 700 MHz proton frequency. Highlighted with gray are the predicted  $\alpha$ -helical regions of TM1-TM2. Residues, for which dihedral angle restraints calculated with TALOS were applied during the structure calculation, are marked by a symbol on top.

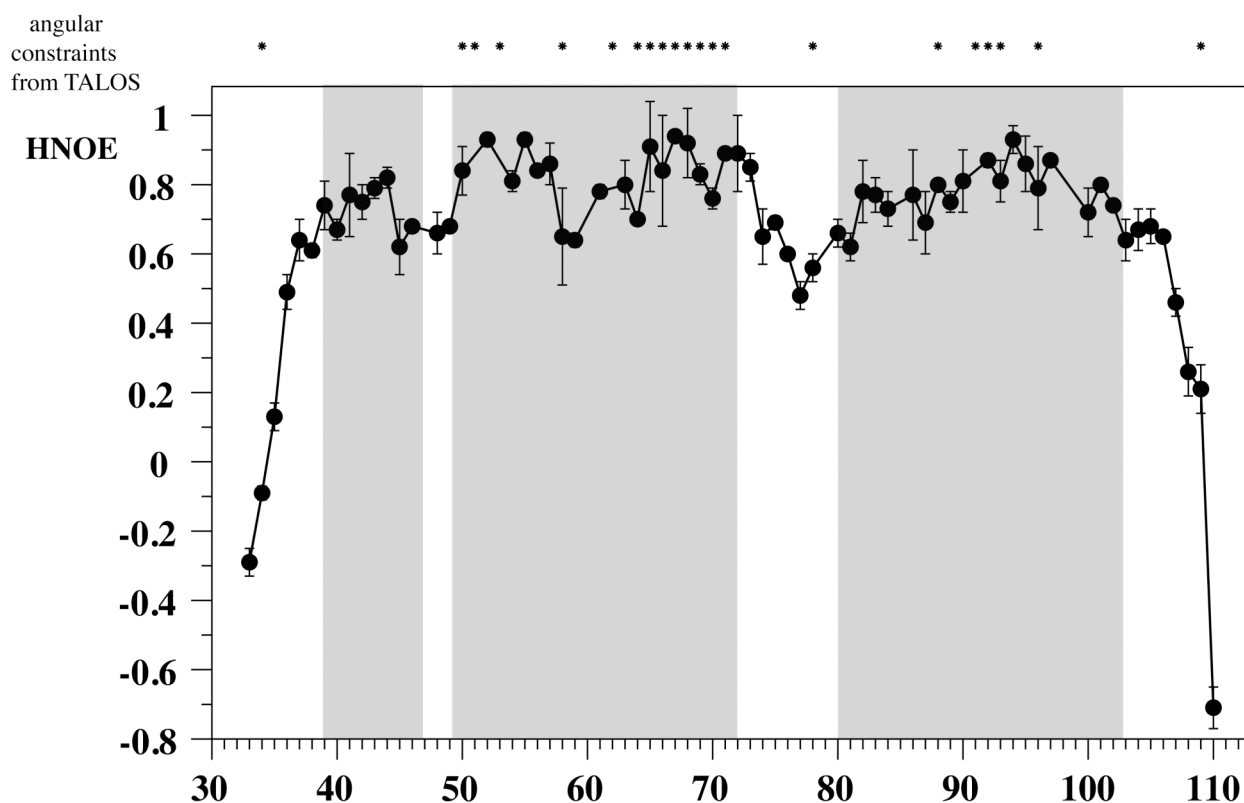

**Figure S6.** Superposition of the lowest-energy conformer of Ste2p(G31-T110) from the calculated 20-conformers bundle with the structure of the same region derived from homology modeling (Eilers *et al.*) fitted for backbone atoms of residues 49-72 and 80-103. Right and left representations differ by a 90° rotation about the bilayer normal. The red/yellow representation corresponds to the experimental structure and the pink/gray to the modeled structure.

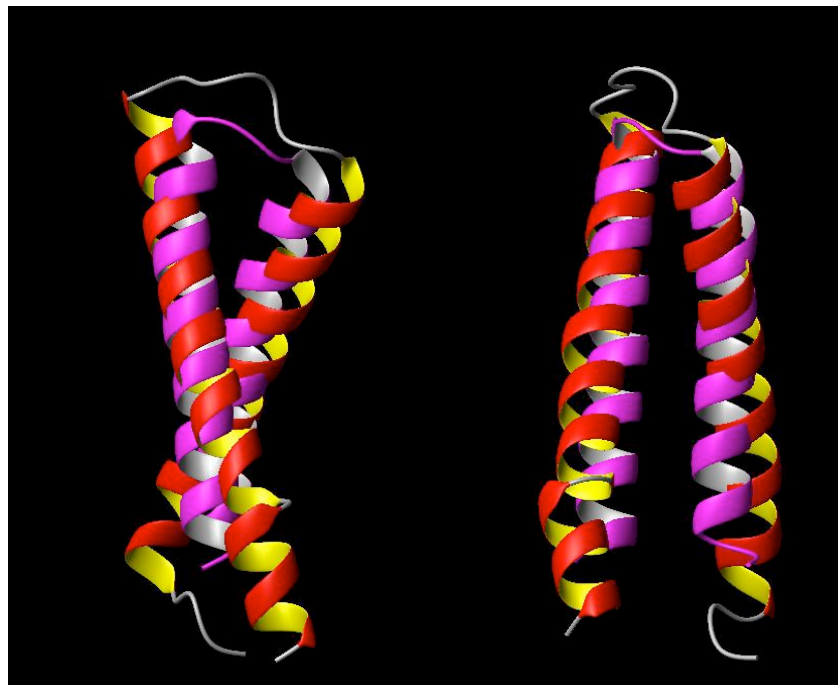

**Figure S7.** Relative peak volumes of signals computed from  $^{15}\text{N},^1\text{H}$ -HSQC spectra of  $^{15}\text{N}$ Ste2p(G31-T110) recorded in the presence of low-power presaturation on the water resonance during the relaxation delay relative to a reference experiment without presaturation.

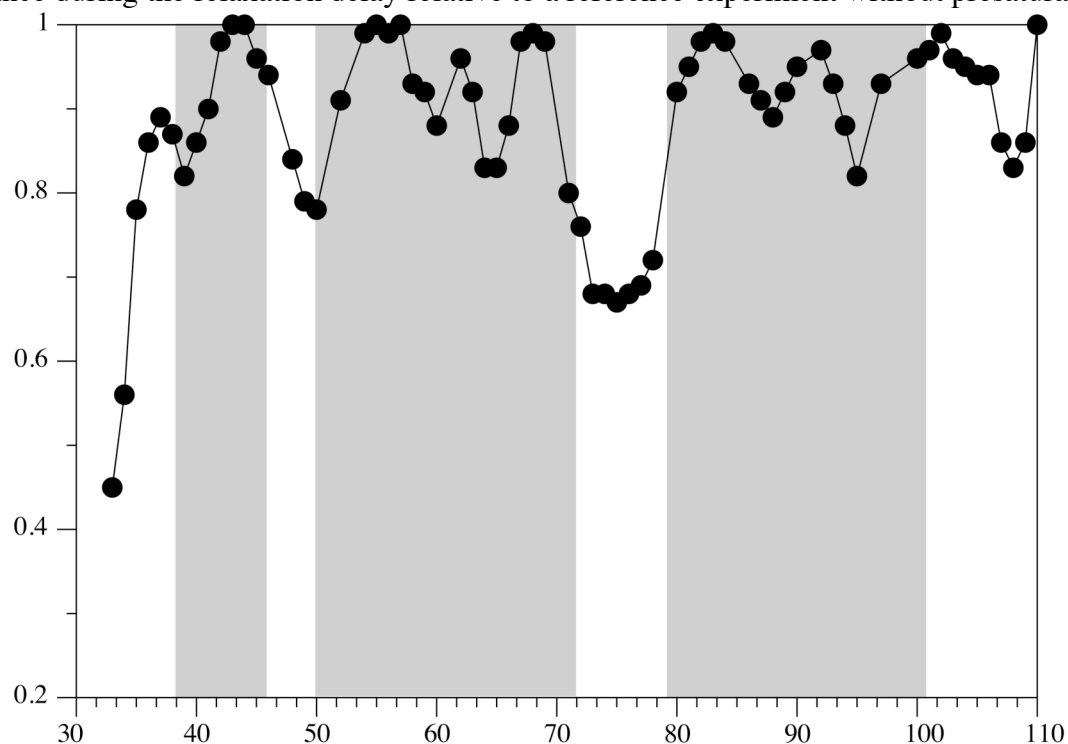

**Table S8.** Information on the structure calculation for Ste2p(G31-T110) in LPPG.

|                                      |                              |                 |
|--------------------------------------|------------------------------|-----------------|
| Distance restraints                  | Total                        | 1247            |
|                                      | Intra-residual               | 439             |
|                                      | Sequential ( $i - j = 1$ )   | 378             |
|                                      | Medium ( $i - j = 2, 3, 4$ ) | 406             |
|                                      | Long-range                   | 24              |
| Dihedral angle restraints            | Total                        | 753             |
|                                      |                              |                 |
| RMSD (Å)                             |                              |                 |
|                                      | Asp39-Ser47 backbone         | $0.25 \pm 0.10$ |
|                                      | Asp39-Ser47 all heavy atoms  | $1.32 \pm 0.26$ |
|                                      | Val49-Thr72 backbone         | $0.40 \pm 0.13$ |
|                                      | Val49-Thr72 all heavy atoms  | $1.20 \pm 0.31$ |
|                                      | Ile80-Leu103 backbone        | $0.57 \pm 0.19$ |
|                                      | Ile80-Leu103 all heavy atoms | $1.38 \pm 0.24$ |
|                                      | Asp39-Leu103 backbone        | $2.36 \pm 0.97$ |
|                                      | Asp39-Leu103 all heavy atoms | $3.28 \pm 1.03$ |
|                                      |                              |                 |
| Structure check (Average %)          |                              |                 |
| Ramachandran statistics              | most favored                 | 83.9            |
| (Gly31-Thr110)                       | additionally allowed         | 15.2            |
|                                      | generously allowed           | 0.9             |
|                                      | disallowed                   | 0               |
|                                      |                              |                 |
| NOE constraint violations            | Number > 0.1 Å               | 5               |
|                                      | Maximum (Å)                  | 0.34            |
|                                      |                              |                 |
| Dihedral angle constraint violations | Number > 2.5 degrees         | 0               |
|                                      |                              |                 |
| AMBER energies (kcal/mol)            | Total                        | -1029.1         |
|                                      | Van der Waals                | 284.5           |
|                                      | Electrostatic                | -1916.5         |
